# Supplementary material for: In Vitro and In Vivo Translational Insights on the Intraoperative Use of Antiseptics and Lavage Solutions Against Microorganisms Causing Orthopedic Infections
Source: Preprints.org preprint supplement (doi:10.20944/preprints202411.0308.v1), 2024-11-06
Supplement: Supplementary file 1 [file supplementary]

Article

*In Vitro* and *In Vivo* Translational Insights on the Intraoperative Use of Antiseptics and Lavage Solutions Against Microorganisms Causing Orthopedic Infections

Bartłomiej Dudek1*, Malwina Brożyna1, Michał Karoluk2, Mariusz Frankiewicz2, Paweł Migdał3, Konrad Szustakiewicz4, Tomasz Matys5, Adrian Wiater6, Adam Junka1*

| **Citation:** To be added by editorial staff during production.  Academic Editor: Firstname Lastname  Received: date  Revised: date  Accepted: date  Published: date  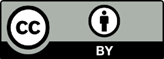  **Copyright:** © 2024 by the authors. Submitted for possible open access publication under the terms and conditions of the Creative Commons Attribution (CC BY) license (https://creativecommons.org/licenses/by/4.0/). |
| --- |

1 “P.U.M.A.”, Platform for Unique Model Application, Department of Pharmacy, Wroclaw Medical University, Borowska 211, 50-534 Wrocław, Poland. B.D.: [bartlomiej.dudek@umw.edu.pl](mailto:bartlomiej.dudek@umw.edu.pl);
M.B: [malwina.brozyna@umw.edu.pl](mailto:malwina.brozyna@umw.edu.pl); A.J: [adam.junka@umw.edu.pl](mailto:adam.junka@umw.edu.pl)

2 Faculty of Mechanical Engineering, Department of Laser Technologies, Automation and Production Organization, Wrocław University of Science and Technology, Ignacego Łukasiewicza 5, 50-371 Wrocław, Poland. P.Sz-Z: [michal.karoluk@pwr.edu.pl](mailto:michal.karoluk@pwr.edu.pl) ; [mariusz.frankiewicz@pwr.edu.pl](mailto:mariusz.frankiewicz@pwr.edu.pl)

3 Department of Bees Breeding, Institute of Animal Husbandry and Breeding, Faculty of Biology and Animal Science, Wroclaw University of Environmental and Life Sciences, Chełmońskiego 38C, 51-630 Wrocław, Poland; P.M.: [pawel.migdal@upwr.edu.pl](mailto:pawel.migdal@upwr.edu.pl)

4 Department of Polymer Engineering and Technology, Faculty of Chemistry, Wrocław University of Science and Technology (WUST), Wyb. Wyspianskiego 27, 50-370, Wrocław, Poland. K.Sz: konrad.szustakiewicz@pwr.edu.pl

5 The Department and Clinic of Angiology and Internal Medicine, Wroclaw Medical University; Borowska 213, 50-556 Wrocław T.M.: [tomasz.matys@umw.edu.pl](mailto:tomasz.matys@umw.edu.pl)

6 Department of Industrial and Environmental Microbiology, Institute of Biological Sciences, Faculty of Biology and Biotechnology, Maria Curie-Skłodowska University, Akademicka 19, 20-033 Lublin, Poland. A.W.: [adrian.wiater@mail.umcs.pl](mailto:adrian.wiater@mail.umcs.pl)


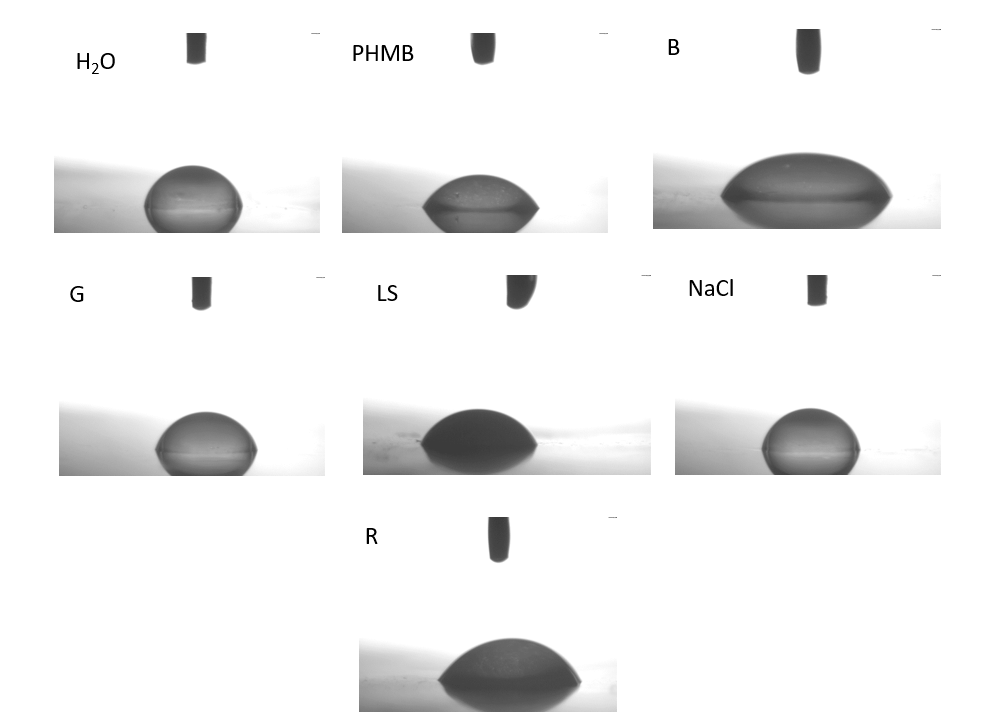


**Supplementary Material 1.** The wettability of the tested solutions. H2O – water; NaCl: saline, PHMB: 0.1% polyhexanide + poloxamer surfactant, G: low-concentrated hypochlorite; LS: 0.04% polyhexanide + macrogol surfactant; R: ringer solution; B: iodine-containing antiseptic.
